# Supplementary material
Source: PubMed Central journal article supplement (PMC4670612)
Supplement: NIHMS686017-supplement-01.pdf [file NIHMS686017-supplement-01.pdf]

# Supplemental Materials

**Supplemental Table 1.** Patient characteristics and co-morbidities (Success only)

| <i>Feature</i>            | <i>Success<br/>(analyzed)</i> | <i>Success<br/>(not analyzed)</i> | <i>p-value*</i> |
|---------------------------|-------------------------------|-----------------------------------|-----------------|
| Patients                  | 8                             | 10                                |                 |
| Age, mean $\pm$ SD, years | 64.3 $\pm$ 8.6                | 63.5 $\pm$ 5.02                   | 0.62            |
| Male                      | 8 (100)                       | 10 (100)                          | 1.0             |
| <b>Comorbidities</b>      |                               |                                   |                 |
| CAD                       | 3 (37.5)                      | 7 (70)                            | 0.34            |
| CHF                       | 1 (12.5)                      | 0 (0)                             | 0.44            |
| Diabetes                  | 3 (37.5)                      | 3 (30)                            | 1.0             |
| Hypertension              | 8 (100)                       | 10 (100)                          | 1.0             |
| Dyslipidemia              | 7 (87.5)                      | 9 (90)                            | 1.0             |
| Renal insufficiency†      | 0 (0)                         | 0 (0)                             | 1.0             |
| Past/current smoker       | 8 (100)                       | 10 (100)                          | 1.0             |
| <b>Medications‡</b>       |                               |                                   |                 |
| Aspirin                   | 8 (100)                       | 9 (90)                            | 1.0             |
| Plavix                    | 7 (87.5)                      | 10 (100)                          | 0.44            |
| Warfarin                  | 1 (12.5)                      | 0 (0)                             | 0.44            |
| Aggrenox                  | 1 (12.5)                      | 0 (0)                             | 0.44            |
| Statin                    | 8 (100)                       | 8 (80)                            | 0.48            |
| Cilostazol                | 3 (37.5)                      | 7 (70)                            | 0.34            |
| Steroids                  | 0 (0)                         | 0 (0)                             | 1.0             |

Categorical data are shown as number (%) and continuous data as mean  $\pm$  standard deviation

CAD, coronary artery disease; CHF, congestive heart failure

\* $\chi^2$  or t-test, where appropriate

†Creatinine > 1.8

‡Medications on discharge following procedure

**Supplemental Table 2.** Patient and procedural characteristics (Success only)

| <i>Feature</i>           | <i>Success<br/>(analyzed)</i> | <i>Success<br/>(not analyzed)</i> | <i>p-value*</i> |
|--------------------------|-------------------------------|-----------------------------------|-----------------|
| Preop ABI                | 0.68 ± 0.15                   | 0.66 ± 0.12                       | 0.8             |
| Postop ABI               | 1.01 ± 0.05                   | 0.96 ± 0.08                       | 0.17            |
| <b>Indication</b>        |                               |                                   |                 |
| Claudication             | 6 (75)                        | 8 (80)                            |                 |
| Rest pain                | 0 (0)                         | 1 (10)                            |                 |
| Tissue loss              | 2 (25)                        | 1 (10)                            | 0.76            |
| <b>Procedure</b>         |                               |                                   |                 |
| PTA                      | 2 (25)                        | 3 (30)                            |                 |
| PTA+Stenting             | 6 (75)                        | 7 (70)                            | 1.0             |
| <b>Intervention Site</b> |                               |                                   |                 |
| SFA                      | 8 (100)                       | 10 (100)                          |                 |
| Popliteal                | 0 (0)                         | 2 (20)                            |                 |
| Tibial                   | 1 (12.5)                      | 0 (0)                             | 0.32            |
| <b>TASC class</b>        |                               |                                   |                 |
| A                        | 4 (50)                        | 1 (10)                            |                 |
| B                        | 2 (25)                        | 5 (50)                            |                 |
| C                        | 2 (25)                        | 4 (40)                            |                 |
| D                        | 0 (0)                         | 0 (0)                             | 0.24            |

Categorical data are shown as number (%) and continuous data as mean ± standard deviation  
 ABI, ankle-brachial index; PTA, percutaneous transluminal angioplasty; SFA, superficial femoral artery; TASC, TransAtlantic Inter-Society Consensus

\*Fisher's exact or t-test, where appropriate

**Supplemental Table 3.** Patient characteristics and co-morbidities (All)

| <i>Feature</i>                        | <i>All</i>     |
|---------------------------------------|----------------|
| Patients                              | 24 (100)       |
| Age, mean $\pm$ SD, years             | 63.3 $\pm$ 6.7 |
| Male                                  | 24 (100)       |
| <b><i>Comorbidities</i></b>           |                |
| CAD                                   | 12 (50)        |
| CHF                                   | 1 (4.2)        |
| Diabetes                              | 9 (37.5)       |
| Hypertension                          | 24 (100)       |
| Dyslipidemia                          | 22 (91.7)      |
| Renal insufficiency*                  | 0 (0)          |
| Past/current smoker                   | 24 (100)       |
| <b><i>Medications</i><sup>†</sup></b> |                |
| Aspirin                               | 23 (95.8)      |
| Plavix                                | 22 (91.7)      |
| Warfarin                              | 1 (4.2)        |
| Aggrenox                              | 1 (4.2)        |
| Statin                                | 20 (83.3)      |
| Cilostazol                            | 11 (45.8)      |
| Steroids                              | 0 (0)          |

Categorical data are shown as number (%) and continuous data as mean  $\pm$  standard deviation

\*Creatinine > 1.8

<sup>†</sup>Medications on discharge following procedure

CAD, coronary artery disease; CHF, congestive heart failure

**Supplemental Table 4.** Patient and procedural characteristics (All)

| <i>Feature</i>             | <i>All</i>  |
|----------------------------|-------------|
| Preop ABI                  | 0.66 ± 0.13 |
| Postop ABI                 | 0.96 ± 0.13 |
| <b>Indication</b>          |             |
| Claudication               | 18 (75)     |
| Rest pain                  | 1 (4.2)     |
| Tissue loss                | 5 (20.8)    |
| <b>Procedure</b>           |             |
| PTA                        | 7 (29.2)    |
| PTA+Stenting               | 17 (70.8)   |
| <b>Intervention Site</b>   |             |
| SFA                        | 24 (100)    |
| Popliteal                  | 4 (16.7)    |
| Tibial                     | 2 (8.3)     |
| <b>TASC classification</b> |             |
| A                          | 6 (25)      |
| B                          | 12 (50)     |
| C                          | 6 (25)      |
| D                          | 0 (0)       |

Categorical data are shown as number (%) and continuous data as mean ± standard deviation  
ABI, ankle-brachial index; PTA, percutaneous transluminal angioplasty; SFA, superficial femoral artery; TASC, TransAtlantic Inter-Society Consensus

**Supplemental Table 5.** Summary of class prediction analyses

| Timepoint | p     | 1 Nearest Neighbor   |               | 3 Nearest Neighbor   |               |
|-----------|-------|----------------------|---------------|----------------------|---------------|
|           |       | Cross Validation (%) | p-value (MCS) | Cross Validation (%) | p-value (MCS) |
| Pre-op    | 0.001 | 42                   | 0.651         | 50                   | 0.502         |
| 2 Hours   | 0.001 | 46                   | 0.615         | 46                   | 0.614         |
| 1 Day     | 0.001 | 77                   | 0.114         | 69                   | 0.236         |
| 7 Days    | 0.001 | 8                    | 0.988         | 23                   | 0.926         |
| 28 Days   | 0.001 | 33                   | 0.669         | 33                   | 0.693         |

MCS, Monte Carlo Simulation

**Supplemental Figure 1**

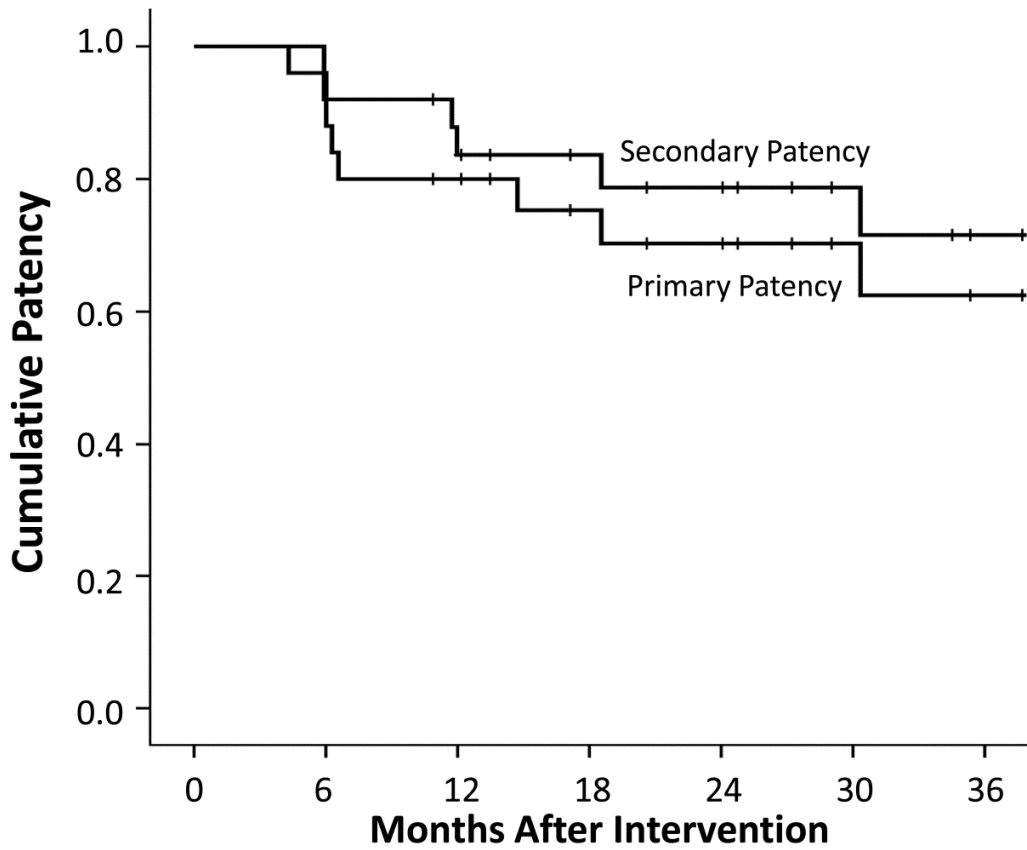

|                          |         |     |     |     |     |     |     |     |
|--------------------------|---------|-----|-----|-----|-----|-----|-----|-----|
| <b>Primary Patency</b>   | At Risk | 24  | 21  | 15  | 11  | 8   | 7   | 3   |
|                          | SE      | .06 | .09 | .09 | .11 | .11 | .13 | .18 |
| <b>Secondary Patency</b> | At Risk | 24  | 22  | 16  | 13  | 10  | 8   | 4   |
|                          | SE      | .04 | .08 | .08 | .10 | .10 | .12 | .18 |

**Supplemental Figure 1.** Kaplan Meier estimations of primary and secondary patency.

Cumulative one and two year primary patency was 79% and 66%, while one and two year secondary patency was 83% and 76%.

## Supplemental Figure 2

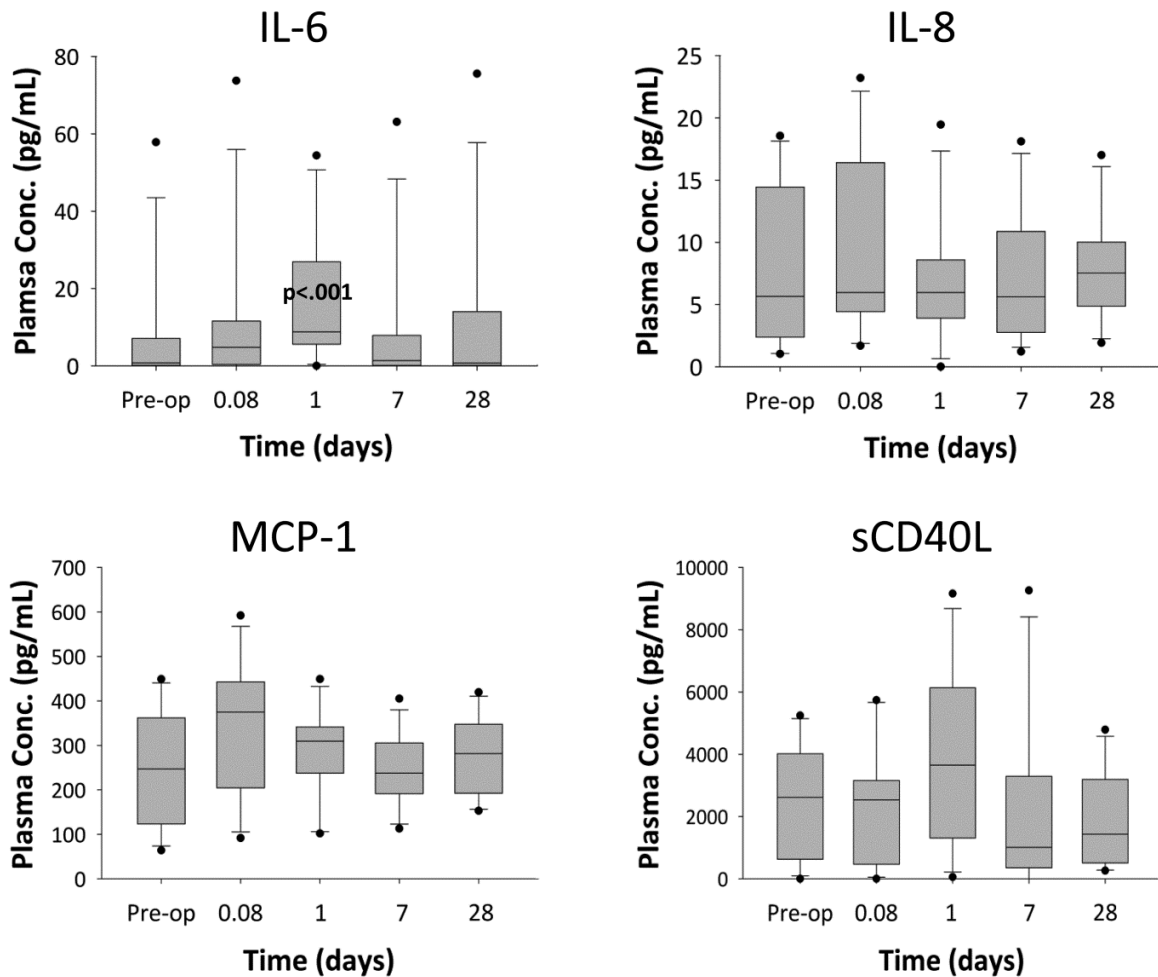

**Supplemental Figure 2.** Plasma inflammatory protein levels following endovascular revascularization. By 24 hours post-intervention, the increase in interleukin-6 (IL-6) concentration ( $16.0 \text{ ng/mL} \pm 5.0$ ) reached the Bonferroni-adjusted significance level compared to preoperative levels ( $7.0 \text{ ng/mL} \pm 4.7$ ,  $p = .001$ ). The plasma concentrations of interleukin 8 (IL-8), monocyte chemoattractant protein-1 (MCP-1), and soluble CD40 ligand (sCD40L) also demonstrated alterations following intervention; however these changes did not reach significance.



### Supplemental Figure 3

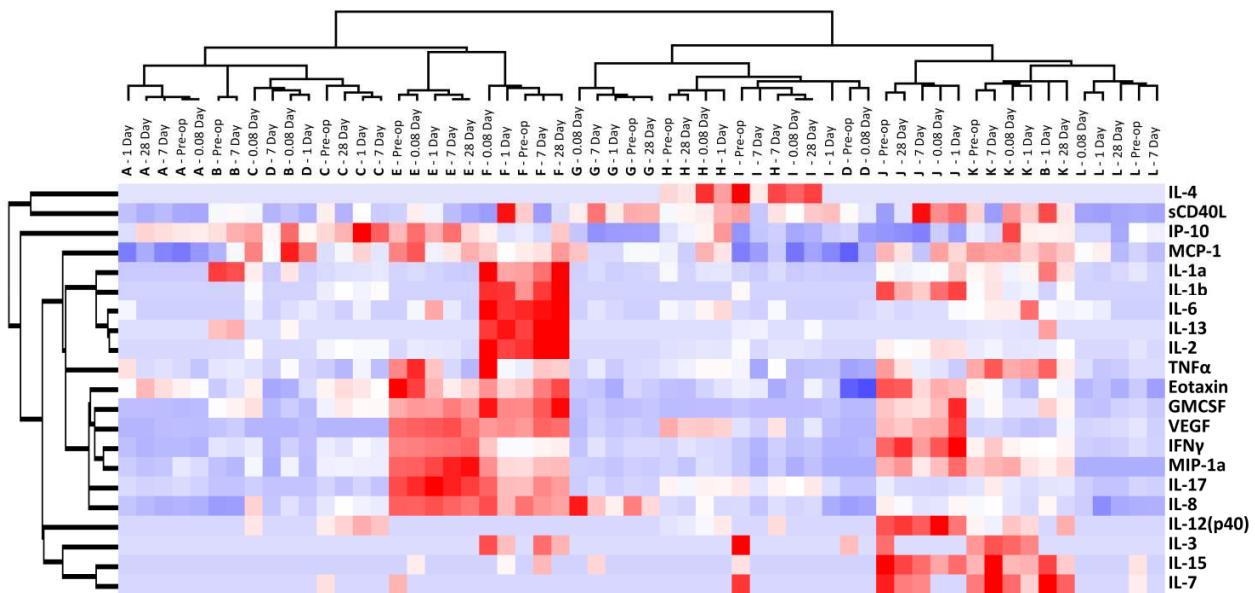

**Supplemental Figure 3.** Unsupervised hierarchical clustering analysis of plasma inflammatory protein concentrations. Each patient sample at each time point is displayed across the x-axis, with each patient represented by the letters A through L. The horizontal dendrogram identifies the individual patient's plasma protein signature as the dominant clustering effect. Each patient appears to have a unique inflammatory protein profile that remains relatively constant following endovascular intervention. Red represents up-regulation and blue represents down-regulation.
